# Supplementary material for: Impact of Body Mass Index on the Outcomes of Catheter Ablation of Atrial Fibrillation: A European Observational Multicenter Study
Source: PubMed Central journal article supplement (PMC6818047; doi:10.1161/jaha.119.012253), 2019-10-04
Supplement: JAH3-8-e012253-s001.pdf [file JAH3-8-e012253-s001.pdf]

# **Supplemental Material**

**Table S1. Predictors of Procedural Complications.**

| Variable                                   | Univariate Logistic Regression |                  |              | Multivariate Logistic Regression |                  |              |
|--------------------------------------------|--------------------------------|------------------|--------------|----------------------------------|------------------|--------------|
|                                            | OR                             | 95%CI            | P            | OR                               | 95%CI            | P            |
| <b>Age (per year)</b>                      | <b>1.02</b>                    | <b>1.00-1.04</b> | <b>0.012</b> | <b>1.02</b>                      | <b>1.01-1.04</b> | <b>0.007</b> |
| Female sex                                 | 1.20                           | 0.84-1.70        | 0.318        | -                                | -                | -            |
| AF duration (per year)                     | 1.02                           | 0.99-1.01        | 0.102        | -                                | -                | -            |
| Paroxysmal AF                              | 0.91                           | 0.66-1.27        | 0.591        | -                                | -                | -            |
| Congestive heart failure                   | 1.17                           | 0.66-2.07        | 0.583        | -                                | -                | -            |
| Hypertension                               | 0.81                           | 0.58-1.13        | 0.205        | -                                | -                | -            |
| Diabetes mellitus                          | 0.59                           | 0.3-1.17         | 0.133        | -                                | -                | -            |
| Stroke or TIA                              | 1.36                           | 0.78-2.37        | 0.276        | -                                | -                | -            |
| Vascular disease                           | 0.91                           | 0.49-1.66        | 0.748        | -                                | -                | -            |
| Obstructive Sleep apnea                    | 1.24                           | 0.69-2.24        | 0.475        | -                                | -                | -            |
| CHA <sub>2</sub> DS <sub>2</sub> -VASc     | 1.06                           | 0.94-1.19        | 0.351        | -                                | -                | -            |
| BMI (per Kg/m <sup>2</sup> )               | 0.98                           | 0.94-1.01        | 0.187        | -                                | -                | -            |
| eGFR (per ml/min)                          | 0.99                           | 0.98-0.99        | 0.040        | -                                | -                | -            |
| Indexed LA volume (per mL/m <sup>2</sup> ) | 0.99                           | 0.98-1.00        | 0.196        | -                                | -                | -            |
| LVEF (per %)                               | 1.01                           | 0.99-1.03        | 0.394        | -                                | -                | -            |
| <b>NOAC</b>                                | <b>0.64</b>                    | <b>0.43-0.97</b> | <b>0.033</b> | <b>0.61</b>                      | <b>0.40-0.92</b> | <b>0.018</b> |
| Center Case-Load (per 100 ablations/year)  | 1.10                           | 1.01-1.20        | 0.030        | -                                | -                | -            |

HR – hazard ratio; CI – confidence interval; AF - atrial fibrillation; TIA - transitory ischemic attack; CHA<sub>2</sub>DS<sub>2</sub>-VASc - cardiac failure or dysfunction, hypertension, age ≥75 years [doubled], diabetes, stroke [doubled] - vascular disease, age 65–74 years, sex category [female]; BMI - body mass index; LA - left atrium; LVEF - left ventricular ejection fraction.
